# Supplementary material for: Development of the Digital Competence in Secondary Education Teachers&rsquo; Training
Source: Preprints.org preprint supplement (doi:10.20944/preprints201806.0285.v1), 2018-06-19
Supplement: Supplementary file 1 [file supplementary]

## Sheet: Hoja1
alumno	sexo	FN	edad	curso	INFORMATION	I1.1	I1.2	I1.3	COMMUNICATION	C2.1	C2.2	C2.3	C2.4	C2.5	C2.6	CONTENT CREATION	CC3.1	CC3.2	CC3.3	CC3.4	SAFETY	S4.1	S4.2	S4.3	S4.4	PROBLEM SOLVING	R5.1	R5.2	R5.3	R5.4
A1	M	1993-07-01	25	1718	2.33333	2	2	3	1.83333	2	2	2	2	2	1	1.75	2	2	1	2	2.5	2	2	3	3	1.75	2	2	2	1
A2	H	1968-10-28	50	1718	1	1	1	1	1.16667	1	1	1	2	1	1	0.75	1	1	1	0	1	1	1	1	1	1	1	1	1	1
A3	H	1987-09-05	31	1718	2	2	2	2	1.5	2	2	1	1	1	2	2	2	2	2	2	1.75	2	2	1	2	2	2	2	2	2
A4	M	1994-01-18	24	1718	2.33333	2	2	3	2.16667	2	2	3	2	2	2	1	1	1	1	1	1.25	1	1	2	1	1.25	1	2	1	1
A5	M	1982-12-15	36	1718	2.66667	3	3	2	2.33333	3	3	2	3	1	2	1	1	1	1	1	1.5	1	1	2	2	2	2	2	2	2
A6	M	1976-05-06	42	1718	1.66667	2	1	2	1	1	1	1	1	1	1	1	1	1	1	1	1.75	2	2	1	2	1	1	1	1	1
A7	M	1994-10-17	24	1718	1	1	1	1	1	1	1	1	1	1	1	1	1	1	1	1	1	1	1	1	1	1	1	1	1	1
A8	H	1993-03-13	25	1718	1.66667	1	1	3	1.16667	1	1	1	2	1	1	1	1	1	1	1	1	1	1	1	1	1.25	1	2	1	1
A9	M	1991-08-21	27	1718	1.33333	1	1	2	1.16667	1	2	1	1	1	1	1	1	1	1	1	1	1	1	1	1	1	1	1	1	1
A10	H	1994-01-01	24	1718	2.33333	2	2	3	1.83333	3	2	1	1	2	2	1.25	1	2	1	1	2.25	2	2	3	2	1	1	1	1	1
A11	H	1994-06-03	24	1718	1.66667	1	2	2	1.5	1	1	1	2	2	2	1	1	1	1	1	1.25	2	1	1	1	1.25	1	2	1	1
A12	H	1979-09-09	39	1718	1	1	1	1	1	1	1	1	1	1	1	1	1	1	1	1	1	1	1	1	1	1	1	1	1	1
A13	M	1993-04-03	25	1718	1.66667	1	2	2	2	2	1	1	3	2	3	1	1	1	1	1	1.25	1	1	1	2	1.25	2	1	1	1
A14	H	1989-03-25	29	1718	1	1	1	1	1	1	1	1	1	1	1	1	1	1	1	1	1	1	1	1	1	1	1	1	1	1
A15	H	1994-10-05	24	1718	1.66667	2	1	2	1.33333	1	1	1	1	2	2	1.25	2	1	1	1	1.25	1	1	2	1	1.5	2	1	2	1
A16	M	1993-11-14	25	1718	1	1	1	1	1	1	1	1	1	1	1	1	1	1	1	1	1	1	1	1	1	1	1	1	1	1
A17	H	1983-09-07	35	1718	1.66667	2	2	1	1.5	2	2	2	1	1	1	1	1	1	1	1	1	1	1	1	1	1	1	1	1	1
B1	M	1987-04-03	30	1617	1	1	1	1	1.2	1	2	1	1		1	1	1	1			1.66667	2	1		2	1.25	2	1	1	1
B2	M	1991-11-05	26	1617	1.33333	1	2	1	1.83333	2	2	2	1	2	2	2	2	2	2	2	1.5	2	1	2	1	1.75	2	1	2	2
B3	H	1993-12-20	24	1617	2.33333	2	3	2	2.5	2	3	3	2	2	3	1.75	1	2	3	1	2.5	3	2	2	3	2.25	2	2	3	2
B4	M	1988-04-16	29	1617	2.33333	2	2	3	2	3	2	2	1	2	2	2	2	1	3	2	3	3	3	3	3	1.75	2	2	1	2
B5	M	1987-09-01	30	1617	2	1	3	2	1.83333	2	2	2	2	1	2	1.75	2	2	2	1	1.5	1	2	1	2	2.25	2	2	3	2
B6	M	1985-10-18	32	1617	2.33333	2	3	2	1.66667	2	3	1	1	2	1	2.25	2	2	3	2	2.5	3	1	3	3	2	2	2	2	2
B7	M	1989-11-26	28	1617	1.33333	1	1	2	1.83333	2	2	1	2	2	2	1.5	1	2	2	1	2.75	3	2	3	3	1.75	2	1	2	2
B8	M	1990-05-21	27	1617	2.33333	2	3	2	2.16667	2	3	2	2	2	2	1.5	2	1	1	2	2.75	3	3	2	3	2.25	2	2	3	2
B9	M	1987-01-06	30	1617	1.33333	1	2	1	1.4	2	1	1	1		2	1.5	2	1	2	1	1.25	2	1	1	1	1.25	2	1	1	1
B10	H	1973-07-14	44	1617	1.66667	2	2	1	1.66667	2	2	1	2	2	1	1.5	1	2	2	1	2	2	2	2	2	1.75	2	2	1	2
B11	M	1990-02-08	27	1617	2	2	2	2	1.5	2	1	1	1	2	2	1.5	2	1	2	1	2.5	3	2	3	2	2	2	2	2	2
B12	H	1990-02-28	27	1617	1.66667	2	1	2	1.83333	2	2	1	2	3	1	2	3	2	1	2	2.25	2	2	2	3	2.5	2	2	3	3
B13	M	1992-08-07	25	1617	1.33333	1	2	1	1.16667	2	1	2	1	0	1	2	2	1	3	2	2	3	2	2	1	1.75	2	2	1	2
C1	M	1993-02-08	23	1516	1.33	2	1	1	1.33	2	2	1	1	1	1	1.25	2	1	1	1	2	2	2	2	2	1.33	2		1	1
C2	M	1991-12-15	25	1516	2.66	3	2	3	1.83	2	2	2	1	2	2	1.25	2	1	1	1	2.25	2	2	2	3	2	2	2	2	2
C3	M	1976-04-03	40	1516	1	1	1	1	1	1	1	1	1	1	1	1	1	1	1	1	1.25	2	1	1	1	1	1	1	1	1
C4	M	1972-03-09	44	1516	1.33333	2	1	1	1.16667	2	1	1	1	1	1	1	1	1	1	1	1.66667	2		2	1	1.25	1	1	2	1
C5	M	1991-01-10	25	1516	1.66667	1	2	2	2	3	2	2	2	1	2	1.25	2	1	1	1	2.25	2	2	2	3	2.25	2	2	2	3
C6	H	1991-11-24	25	1516	1	1	1	1	1	1	1	1	1	1	1	1	1	1	1	1	1	1	1	1	1	1	1	1	1	1
C7	H	1979-08-07	37	1516	1.33	2	1	1	1.33	2	2	1	1	1	1	1	1	1	1	1	2	2	2	2	2	1	1	1	1	1
C8	M	1984-10-15	32	1516	1.33	2	1	1	1.5	2	2	2	1	1	1	1.25	2	1	1	1	1.75	2	2	2	1	2	2	2	2	2
C9	H	1990-02-24	26	1516	2.33333	2	3	2	1.66667	2	2	2	2	1	1	1.5	2	1	1	2	3	3	3	3	3	2.75	3	2	3	3
C10	M	1980-08-14	36	1516	2	2	2	2	1.66667	2	2	2	1	1	2	1.25	2	1	1	1	1.75	2	2	1	2	1	1	1	1	1
C11	H	1991-02-20	25	1516	1	1	1	1	1.33	2	2	1	1	1	1	1.25	2	1	1	1	1.75	2	2	2	1	1.5	2	1	2	1
C12	H	1991-02-02	25	1516	1.66	2	1	2	1.5	2	1	1	1	2	2	2	3	2	1	2	2.5	3	2	3	2	1.5	2	1	2	1
C13	H	1992-01-27	24	1516	1.66	2	1	2	2	2	3	2	1	2	2	1.75	2	2	2	1	2	2	2	2	2	1.5	2	2	1	1
